# Supplementary material for: Mitochondrial genome variation and prostate cancer: a review of the mutational landscape and application to clinical management
Source: PubMed Central journal article supplement (PMC5642640; doi:10.18632/oncotarget.19926), 2017-08-04
Supplement: oncotarget-08-71342-s001.pdf [file oncotarget-08-71342-s001.pdf]

## **Mitochondrial genome variation and prostate cancer: a review of the mutational landscape and application to clinical management**

### **SUPPLEMENTARY MATERIALS**

**Supplementary Table 1: All unique PCa or prostate tissue associated mtDNA somatic mutations reported to date. See Supplementary\_Table\_1**
